# Supplementary material for: A proposed integrated approach for the preclinical evaluation of phage therapy in Pseudomonas infections
Source: PubMed Central journal article supplement (PMC4908380; doi:10.1038/srep28115), 2016-06-15
Supplement: srep28115-s1.pdf [file srep28115-s1.pdf]

# **A proposed integrated approach for the preclinical evaluation of phage therapy in *Pseudomonas* infections.**

Katarzyna Danis-Wlodarczyk<sup>1,2</sup>, Dieter Vandenheuve<sup>2</sup>, Ho Bin Jang<sup>2</sup>, Yves Briers<sup>2,3</sup>, Tomasz Olszak<sup>1</sup>, Michal Arabski<sup>4</sup>, Slawomir Wasik<sup>5</sup>, Marcin Drabik<sup>6</sup>, Gerard Higgins<sup>7,8</sup>, Jean Tyrrell<sup>8</sup>, Brian J. Harvey<sup>8</sup>, Jean -Paul Noben<sup>9</sup>, Rob Lavigne<sup>2\*</sup>, Zuzanna Drulis-Kawa<sup>1\*</sup>

## **Supporting information**

### **Suppl. 1.** Supplementary information of genome and proteome analysis of KTN4

Using high throughput sequencing by the Illumina MiSeq platform, the complete genome sequence was determined. KTN4 has a linear, circularly permuted and terminally redundant, A+T-rich (36,9% GC) double-stranded DNA molecule (279,593 bp). In total, 368 open reading frames (ORFs) could be predicted, varying in size from 36 to 2237 amino acid residues, as well as six tRNAs (Leu (UUA), Pro (UUG), Met (CAU), Asp (GUC), Asn (GUU), Thr (UGU) . Of these, 87 proteins have a predicted function. According to the orientation of transcription, ORFs are organized into operons and most are on a positive strand. The KTN4 shows a genome-wide nucleotide sequence similarity to: phiKZ 99%, PA7 99%, phiPA3 84%, 201phi2-1 78% (BLAST). As such, it can be defined as an isolate of the *Pseudomonas* phage phiKZ species. However, there are few significant differences. Genome of KTN4 lacks phiKZ gp24.1 (frame shift caused by two deletions) and gp24.2 (point mutation). In this position, there is a clear sequence of gp34 KTN4 on a positive strand. Also phiKZ gp70.1 is absent, showing only 58,27% nucleotide sequence similarity to the KTN4 genome. Two genes (KTN4 gp93 and gp94) show less than 60% nucleotide similarity to phiKZ genome and several genes have no similarity (KTN4 gp23-26, gp30-32, gp75, gp286-287, gp325, gp321). Finally, two additional proteins were annotated, which are also present in phiKZ genome and corrected according phiKZ RNA-seq (KTN4 gp14, 97,70% homology and gp59, 98,60% homology). None of these

genes have a predicted function. Based on phiKZ RNA-seq analysis performed previously by Ceysens P.J *et al.* (Ceysens et al. 2014) and using the PISE EMBOSS fuzznuc program, 47 promoters were predicted for phage KTN4. Among them, 31 are early phage-specific promoters with highly conserved, uni-directionally distributed AT-rich intergenic motifs (5'-TATATTAC-3') (Fig. S2 A). Furthermore, less conservative upstream (5'-TTTaA-3') and downstream (5'-TG-3') motifs were found. The middle promoters are located on both strands and distributed throughout the whole genome. They are linked by only a weak AT-rich motif (5'-AAanntTAC-3'; lowercase letters represent a lower level of conservation) centered at position 24 with respect to the transcription start site (Fig. S2 B). For late transcription no sequence conservation upstream of 5' ends could be detected apart from a 5'-TATG-3' motif overlapping the transcription start site (11 late promoters) (Fig. S2 C). Using ARNOLD software, 107 of putative factor-independent terminators were predicted. Most potential stem-loop transcription terminators contain the tetranucleotide UUCG loops (Fig. S3). Using ESI-MS/MS analysis of proteins from denaturated phage particles fractionated on SDS-PAGE, 111 gene products have been identified, among which five virion-unrelated enzymes, 36 virion-associated proteins and 70 structural gene products, with sequence coverages ranging between 5,94% to 89% (Fig S4, Table S1). The KTN4 structural proteins were compared to their homologues from phiKZ (NC\_004629.1 from 2008 and AF399011.1 from 2013), PA7 (JX233784.1), PhiPAK3 (HQ630627.1) and 201phi2-1 (NC\_010821.1) phages (BLASTP). As expected, the highest similarity was found for phiKZ structural proteins, ranging from 63% to 100%, except for gp93, which was identical to PA7 hypothetical protein (AFO71119.1). Twenty two structural head proteins were identified including gp215 head protease identical to phiKZ gp175 and a major head protein gp155 with 98% similarity to phiKZ gp120 (Thomas et al. 2012), The contractile tail of phiKZ, the closes homologue to KTN4, is built from at least 32 different proteins, but a definitive structural function was assigned to only two of them: the

tail sheath protein (KTN4gp39 versus phiKZ gp29) and the tail tip protein (KTN4 gp166 versus phiKZ gp131). Tail tip protein is located at the periphery of the baseplate and possibly associates with fibers that emanate from the baseplate. In the ESI-MS/MS analysis two additional proteins were identified gp181 (putative tail sheath protein) and gp182 (putative tail fiber). The presence of tail associated enzyme gp221 (structural peptidoglycan hydrolase) corresponded to gp181 of phiKZ phage. This enzyme cleaves the host cell wall during the first stage of the life cycle (Briers et al. 2008). In the centre of the phiKZ baseplate, there is a density that resembles the needlelike ‘‘cell-puncturing’’ device of T4, which is most likely composed of gp181. Further analysis reveal gp52, that represents a chain A of monomeric subunit of Tubz, protein believed to be essential for the correct centering of replicated bacteriophage virions within the bacterial host. Moreover, four  $\beta/\beta'$ -like virion-associated proteins in KNT4 phage (gp106, gp185, gp219, and gp220) were assigned as a non-canonical multi-subunit viral RNA polymerase (RNAP) similar to phiKZ gp80, gp149, gp178, gp180 (Ceysens et al. 2014). During ESI-MS/MS analysis we were not able to identify any peptide corresponding to gp202 (phiKZ gp164) and gp224 (phiKZ gp 184) (Ceysens et al. 2014). Furthermore, the analysis of phiKZ RNAP performed by (Yakunina et al. 2015) allowed to identify five homologous subunits in KTN4 genome, the products of early phage genes. Four of these are cellular RNAP subunits homologs of the non-virion set (nvRNAP): 1) gp74, homologous to gp55 phiKZ, however shorter by 41 amino acids; 2) gp95 and gp96 (phiKZ gp71 and gp73); phiKZ gp72, a part of phiKZ subunit has no homologue in KTN4 genome; 3) gp97 identical to gp74 phiKZ and 4) gp158 identical to gp123 phiKZ. The fifth subunit, gp90 identical to gp68 phiKZ, is a protein of unknown function with no similarity to known RNAP subunits or any other known protein family. Gp74 and gp97 together correspond to msRNAP largest (bacterial  $\beta'$ ) subunits and gp95 and gp96 subunit corresponds to the C-terminal half of msRNAP second largest ( $\beta$  in bacteria) subunits. Gp158 is highly diverged homolog of the N-terminal half of the second

largest ( $\beta$  in bacteria) msRNAP subunits. This complex initiates transcription from late promoters in rifampicin-resistant manner, tested *in vitro* in phiKZ, which suggests that virus relies on its own transcription machinery for the entire infection process. However, the late promoter 5'-TATG-3' conserved motif is necessary for transcription by nvRNAP *in vitro* (Yakunina et al. 2015). The endolysin of KTN4 (gp180) is highly identical (99%) to the endolysin of *P. aeruginosa* phiKZ gp144. This endolysin is well studied both at the molecular, biochemical (Briers et al. 2007; Briers et al. 2008; Cloutier et al. 2010) and structural level (Fokine et al. 2008). The consensus motifs for peptidoglycan binding (underlined) and the catalytic residue (boxed) are fully conserved in KTN4 gp180.

The protein sharing network for jumbo phage KTN4 is presented in Fig. 1. A resulting network comprises 495 phages (nodes) belonging to *Myoviridae*, *Siphoviridae*, *Podoviridae*, or uncharacterized and other phages and 6,948 relationships (edges) between them (Fig. 1A). In this graph, phage KTN4 was placed in a single component with five well-known *Pseudomonas* phiKZ-related phages including phiKZ, phiPA3, 201phi2-1, EL and OBP (Cornelissen et al. 2012), as well as phages phiJM-2012, SPN3US, CR5, and phiEaH2, which was separated from other components. When the network topology was computed with two classical measures such as the clustering coefficient (CL) and betweenness centrality (BC) (Brohée et al. 2008), this component shows the highest CL = 1 (absolute cohesiveness) and the lowest BC = 0 (none of node acting as a bridge among other pairs of nodes). This network structure reflects the distinct core gene-sets shared between their genomes (Jang et al. 2013), which form a tight-knit clique of full interconnectivity. Next, the connectivity pattern of this component has been investigated not only on the basis of protein sequence identities, but also according to phage-phage similarity score after normalizing the number of shared genes between genomes (Leplae et al. 2010) (Lima-Mendez et al. 2008). As a result, over the threshold of 60% identity, phages KTN4, phiKZ, phiPA3, and 201phi2-1 kept forming an in-group relationship with phiKZ being the

closest relative to KTN4 (Fig. 1B). In addition, KTN4 was more closely related to phiKZ, phiPA3, and 201phi2-1 with the phage-phage similarity score ranging from 157.2 to 999.9, indicating more shared homologous genes between them than others. The other *Pseudomonas* phages including EL and OBP were connected for identity values less than 35% and similarity score, 79.9. The phages phiEaH2, SPN3US, CR5, and phiJM-2012, having different host ranges (i.e., *Erwinia*, *Salmonella*, *Cronobacter*, and *Vibrio* sp., respectively), were weakly connected to other phiKZ-related members in terms of both shared gene contents and sequence identity. The genetic relationships of KTN4 have been investigated by constructing a mathematical model of gene (protein)-sharing network, extending to possible close relatives. In our phage population network, KTN4 is constricted to a single isolated component comprising the five *Pseudomonas* phiKZ-related phages and other potential relatives. Subsequent network decomposition strongly indicates that KTN4 belongs to the “phiKZ-like viruses”, subdivision of the phiKZ-related groups (Cornelissen et al. 2012), with the large proportion of phiKZ-specific core gene-sets in common to the phiKZ, phiPA3, and 201phi2-1. More specifically, the connectivity patterns suggest that phiKZ appears to be the closest relative to KTN4 as their protein families with more than 90% sequence identity can be considered more recently shared than those of other phage members in this group (Halary et al. 2010). In addition, our population network can reveal other informative connections. The phages phiEaH2, SPN3US, and CR5 were found to interconnect solely with the phiKZ-related phages, indicating that they are probably diverged member of the phiKZ-related group as observed in phiJM-2012 (Jang et al. 2013). These results suggest that the phiKZ-like phages’ diversity has not been fully delimited and that there are additional more distant relatives yet to be discovered.

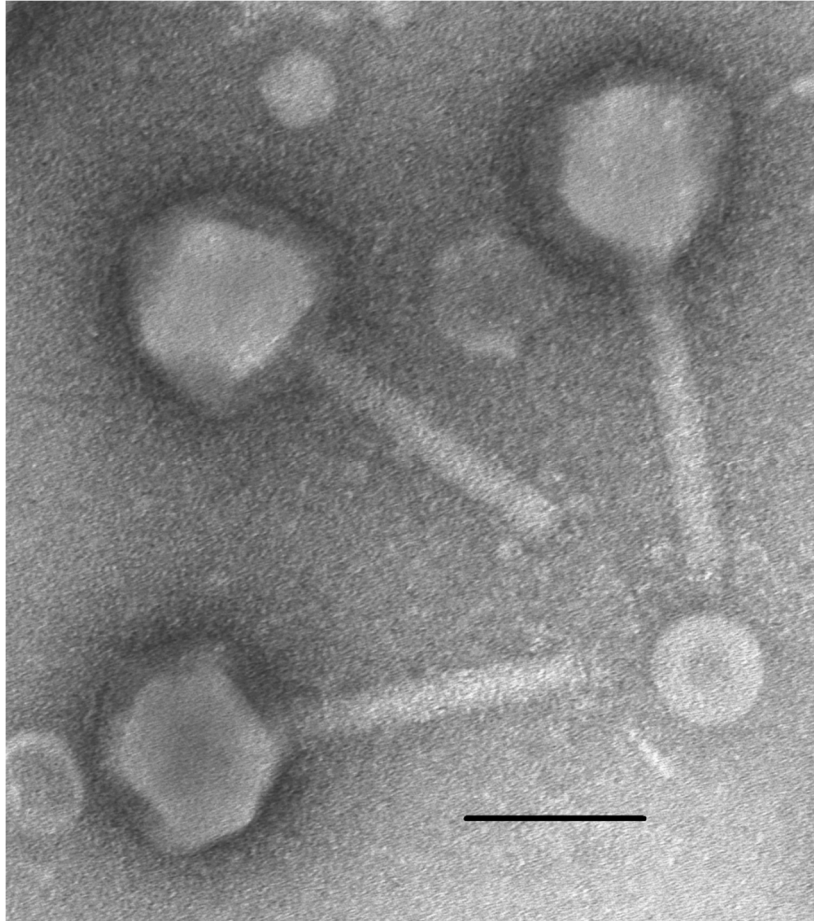

**Fig. S1.** Transmission electron microscopic images of phage KTN4. The scale bar represents 100nm.

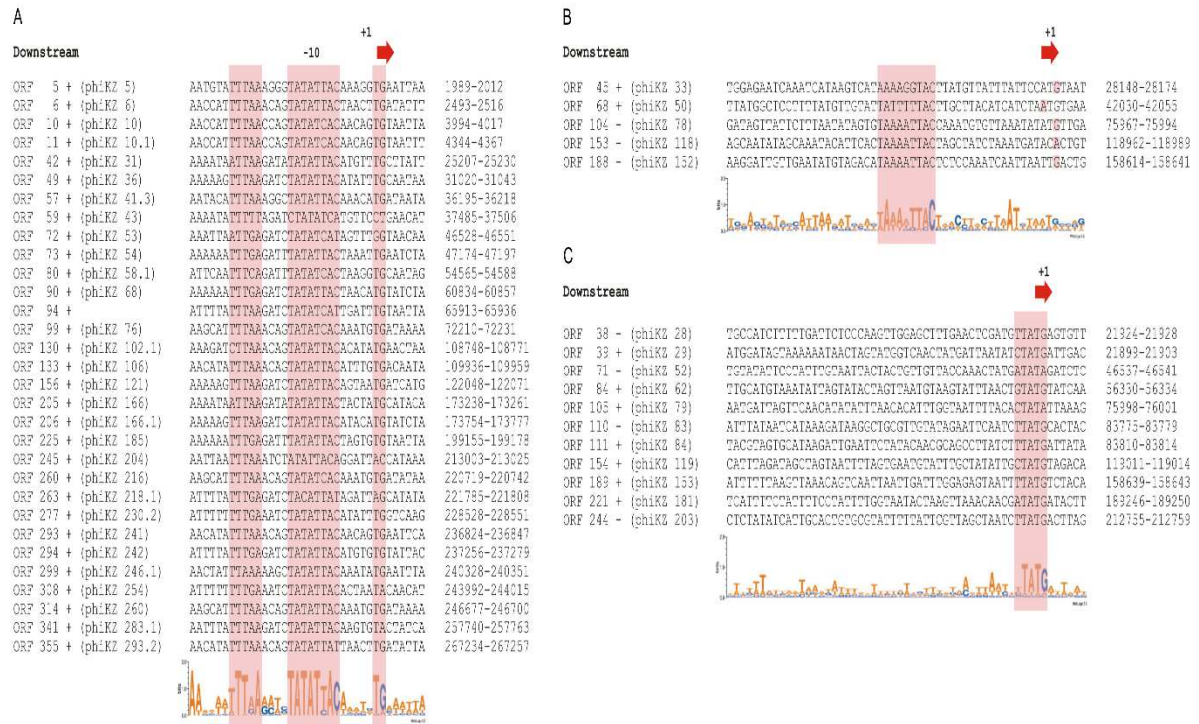

**Fig S2.** Alignments of KTN4 promoters. (A) Early promoters. The 5' ends of primer extension products, which correspond to the transcription start sites, are located ~ 10 bp downstream from the center of the core TATATTAC motif and are associated with an additional conserved 5'-TG-3'motif. (B) Middle promoters. They are united by only a weak AT-rich motif (5'-AAanntTAC-3'; lowercase letters represent a lower level of conservation) centered at position 24 with respect to the transcription start site (C) Late promoters. No sequence conservation upstream of 5' ends of late transcripts could be detected apart from a 5'-TATG-3' motif overlapping the transcription start site. The corresponding sequence logos are depicted below the alignments. Pink bars delineate conserved promoter elements.

| KTN4      | Terminators  |                                                        |        |               |  |
|-----------|--------------|--------------------------------------------------------|--------|---------------|--|
| ORF 4     | + Erpin +    | ACATAAATAAGCCTTCCCCAGGGGAAGGCTTTATGTGTCATGTAT          | -17.40 | 1946-1965     |  |
| ORF 8     | + Both +     | TGGCGACATACACCCCTCCCTTCGGGGGAGGGCTTTATTTTCAATA         | -17.80 | 3569-3590     |  |
| ORF 16    | + Both +     | CACGCAATAATGGGAGTCTTCGGGACTCCCTTTTATTTTCTA             | -16.10 | 7171-7188     |  |
| ORF 18    | + Both +     | AACGATATAAATACCCTCCTTCGGGAGGGTATTATTTTGTGA             | -17.50 | 8763-8782     |  |
| ORF 33    | + Rnamotif + | GGCTATATGTCGTCAGTTTAAGCTTGACTTTGGTGGCCCAA              | - 8.70 | 13835-13855   |  |
| ORF 35    | - Both -     | TTAAATATAAAGCCCCCTAGGAACCCACTAGGGGGCTTTATAACGTCCT      | -16.20 | 16500-16476   |  |
| ORF 41    | + Both +     | TAAAGCATAATGCCCTCCCTTCGGGGGAGGGCTTTATGTTGTGA           | -18.50 | 25158-25175   |  |
| ORF 43    | + Both +     | TAAAGCATAAAGCCCCCTCCCTTCGGGGGAGGGCAATTATGTTTATT        | -18.90 | 26845-26865   |  |
| ORF 44    | - Both -     | ATAAACATAATGCCCTCCCGCAATGGGAGGGCTTTATGCTGTTAAG         | -17.80 | 26865-26845   |  |
| ORF 46    | + Erpin +    | GTAATATAATGCCCTCCCTTCATTAAGGAGGGCTTTATGATGATTT         | -17.70 | 29290-29311   |  |
| ORF 48    | + Erpin +    | ATGACATATTTGCCCTCCCTTCGGGAGGGCTTTATGCTGAGTT            | -16.30 | 30981-30998   |  |
| ORF 52    | + Both +     | TACTTATAATGGAGCCCTTCGGGGCTCCCTTTATTTT                  | -18.20 | 34542-34559   |  |
| ORF 55    | + Both +     | TCGAAAGAGTCCACCTGGATGGGCTTTATATACTAG                   | - 9.00 | 35551-35566   |  |
| ORF 57    | + Both +     | TAATGGCATAAGCCCCCTCCATTAATGGGAGGGCAATTATGCTTTTT        | -19.20 | 36537-36557   |  |
| ORF 58    | - Both -     | AAAGACATAATGCCCTCCCTTCATTAAGGAGGGCTTTATGCCATTAAG       | -18.50 | 36557-36537   |  |
| ORF 60    | + Erpin +    | TACTAAATAAAGCCCCCTCCCTTCATGGGGGGCTTTATACCATTAA         | -14.70 | 39035-39054   |  |
| ORF 67    | + Both +     | ATAACTATAAAGGAGCCATTATGGCTCCCTTTATGTTGTGA              | -11.80 | 42000-42016   |  |
| ORF 68    | + Erpin +    | TAAGAAATATAGCCTCCCTTCATGGGAGGGCTTTATATACTAAA           | -14.40 | 44397-44415   |  |
| ORF 70    | + Both +     | ACGGCATAAACCCTCCCAATTAAGGAGGGGGCTTTATGTCACATT          | -18.20 | 45385-45406   |  |
| ORF 71    | - Erpin -    | TGTGACATAAACCCTCCCAATTAAGGAGGGGGCTTTATGCGGTTT          | -18.70 | 45406-45385   |  |
| ORF 73    | + Both +     | AAACTGATATAGCGGCTCCCTTCGGGGGAGGGCTTTATGCTCCTT          | -20.00 | 49476-49495   |  |
| ORF 77    | + Both +     | AAATAAATAATAGGGAGTTCAGCTCCCTTATTTTCTTGA                | -14.50 | 53627-53646   |  |
| ORF 81    | + Erpin +    | TTAAATAAATGAGAGTCCCGTACAGGGGGCTTCTTATCGTTTAG           | -13.80 | 55484-55504   |  |
| ORF 92    | + Both +     | CACGGCATAAACCAGGGGGCTTAAGGTTCCCTGGCTTGTCTTAAAAAC       | -15.70 | 65499-65522   |  |
| ORF 98    | + Both +     | GGCATAAATGATCCCTCCCTTCATTAAGGAGGGCTTTATGCTTTTT         | -17.10 | 72155-72176   |  |
| ORF 101   | + Rnamotif + | GGCGACATAAACCCTCCCTTCATTAAGGAGGGGGCTTGTCTTTTTAT        | -17.50 | 73283-73304   |  |
| ORF 104   | - Rnamotif - | AATAATGACGAGGTGGAACCTCCACTTCCTTCGTTCTCGA               | - 8.50 | 75265-75251   |  |
| ORF 107   | + Erpin +    | GTAACATATTTGCCCTCCCTTCAGGGGAGGGCTTTATGCTGATTA          | -16.30 | 79747-79764   |  |
| ORF 109   | + Both +     | CACATATAAACCCTCCCTTCAGGGGAGGGCTTTATTCGTTAAC            | -15.70 | 82201-82220   |  |
| ORF 110   | - Both -     | TAACGAATAAACCCTCCCTTCATTAAGGAGGGGGCTTTATGATGTC         | -15.30 | 82220-82201   |  |
| ORF 113   | + Both +     | TACAACATAATGCCCTCCCTTCAGGGGAGGGCTTTATGACCTTATT         | -19.60 | 86840-86859   |  |
| ORF 120   | + Both +     | ACAAACATAATGAGGAACCCCTTCGGGGCTTCCCTTATGCTATGTA         | -15.30 | 96180-96200   |  |
| ORF 122   | + Both +     | GACGACATATTGACGGGGCTTCGGAAGTCCCTTCATGTTAGGAG           | -14.90 | 99507-99530   |  |
| ORF 124   | + Both +     | ACAAACATAAACCAGGGGGCTTCATTAAGGCTCCCTTTATGCTGTTAG       | -16.20 | 103225-103244 |  |
| ORF 136   | + Both +     | TAAGTATAATGGGAGTCTTCGAGCTCCCTTTATTTTCTA                | -16.10 | 114200-114137 |  |
| ORF 142   | + Erpin +    | ATAGAAAAAACCACCCCTTATTAAGGGGGCTTTATAAAGAGGTT           | -13.30 | 113888-113908 |  |
| ORF 150   | + Rnamotif + | TGAATCGGATCGCCCCCTAGGGGGCTTTTATTTTATA                  | - 9.10 | 116426-116438 |  |
| ORF 151_1 | - Rnamotif - | AATCTACACTGTCTCCTTTAGGGGAGCAgTATGTTATAGCT              | -12.10 | 116550-116531 |  |
| ORF 151_2 | - Rnamotif - | AAAGCATTAAAGCCCTCATAGGAGGGGGCTTTATGTCGTA               | -11.70 | 116704-116689 |  |
| ORF 155   | + Both +     | AACGACATAGCCCTCCCTTCGGGGGAGGGCTTTATGTTGAT              | -21.50 | 122002-122021 |  |
| ORF 159   | + Both +     | TAAGCATAAAGCCCTCCCTTCGGGAGGGCTTTATGACT                 | -18.40 | 127450-127467 |  |
| ORF 160   | - Both -     | TAAGACATAGCCCTCCCTTCATTAAGGAGGGGGCTTTATGCCATTAC        | -17.20 | 128196-128175 |  |
| ORF 164   | + Erpin +    | AACAACATAATGCCCTCCCTTCAGGGGAGGGCTTTATGACCTAAC          | -18.20 | 134466-134486 |  |
| ORF 165   | - Both -     | TAAGTCATAAGCCCTCCCTTCATTAAGGAGGGCAATTATGTTGTTAG        | -18.50 | 134486-134466 |  |
| ORF 167   | + Both +     | ACCCGGCATAAGACACAGCCAAAGCTTGTCTCTTTTGTGCTTT            | -11.70 | 138555-138579 |  |
| ORF 178   | + Both +     | AAAACATAAAGCCCTCCCTTCATTAAGGAGGGGGCTTTATAATGCTAT       | -14.20 | 147015-147037 |  |
| ORF 180   | + Rnamotif + | TGTAACTTTTGAGAGTCCCTTCGGGAGCTCTTATGTTGTTAA             | -17.30 | 148547-148566 |  |
| ORF 182   | + Both +     | AACGACATATTGCCCTCCCTTCGGGGGAGGGCTTTATTTGTC             | -21.50 | 154331-154350 |  |
| ORF 189   | + Both +     | TAACAGCATAAGCCCTCCCTTCAGGAGGGGGCTTTATGTCGTACCA         | -18.40 | 159606-159627 |  |
| ORF 190   | - Erpin -    | TACGACATAATGCCCTCCCTTCGGGGGAGGGCTTTATGCTGTTATC         | -17.70 | 159627-159606 |  |
| ORF 194   | + Both +     | TGCATAAATGAGAGGGGCAAGGCCCTCTCTTATATAATCT               | -16.20 | 163871-163836 |  |
| ORF 197   | + Both +     | TTTTAATTTAAAGCGGATCTGTTTAAAGTGGATCCGCTATTATTCGTCCTA    | -12.70 | 165695-165722 |  |
| ORF 200   | + Both +     | TAACAGCATAAGCCCTCCCTTCATTAAGGAGGGCAATTATGTTCTTAA       | -19.20 | 169233-169253 |  |
| ORF 201   | - Both -     | AAGAACATAATGCCCTCCCTTCATTAAGGAGGGGGCTTTATGCTTAAA       | -18.50 | 169264-169530 |  |
| ORF 203   | + Both +     | AAGCAACATAAGCCCTCCCTTCATTAAGGAGGGCAATTATATTAGTAA       | -18.50 | 172994-173014 |  |
| ORF 204   | - Both -     | ACTAATAAATGCCCTCCCTTCATTAAGGAGGGGGCTTTATGTTGCTTAT      | -18.20 | 173014-172994 |  |
| ORF 209   | - Erpin -    | AACGACATAATGCCCTCCCTTCATTAAGGAGGGGGCTTTATGCTTAA        | -18.50 | 175215-175195 |  |
| ORF 214   | + Both +     | TGACAGCATAAGCCCTCCCTTCATTAAGGAGGGGGCTTTATGCTTTTT       | -18.90 | 179703-179723 |  |
| ORF 215   | - Both -     | AAAGACATAATGCCCTCCCTTCATTAAGGAGGGGGCTTTATGCTTAA        | -17.80 | 179723-179703 |  |
| ORF 218   | - Rnamotif - | GGCACCCAGCTCCCTTCATTAAGGAGGGGGCTTTTAACTGAG             | -13.20 | 183101-183080 |  |
| ORF 221   | + Both +     | AATCTATAAAGGAGCCCTCCCAATTAAGGAGGGGGCTTTATTTGTC         | -15.30 | 196004-196027 |  |
| ORF 224   | + Both +     | TTGACATAAATGCCCTCCCTTCGGGGGAGGGCTTTATTTGCTAT           | -18.20 | 199116-199133 |  |
| ORF 227   | + Both +     | CAATATAAATAGATCAGTGGTGGATTCGCCACTGGTCTTTTTTATATTA      | -12.00 | 200478-200504 |  |
| ORF 230   | + Both +     | ACGATATAATAGAGTCCCTTCATTAAGGAGGGGGCTTTATTTATAAT        | -16.30 | 202265-202285 |  |
| ORF 238   | + Both +     | GTTATATAATACCCTCCCTTCGGGGGAGGGGGCTTTATGTTTAA           | -19.20 | 206302-206321 |  |
| ORF 239   | + Rnamotif + | TACTTTTATAGGAGAGACATGATGTTCTCTCTTTTTTGCAGTAA           | -12.70 | 206931-206953 |  |
| ORF 241   | + Both +     | AACAACATAATGCCCTCCCTTCATTAAGGAGGGGGCTTTATGCGTTAAA      | -18.50 | 208132-208152 |  |
| ORF 242   | - Both -     | TAACGGCATAAAGCCCTCCCAATTAAGGAGGGGGCTTTATGTTGTTTTA      | -19.20 | 208152-208132 |  |
| ORF 245   | - Both -     | AATGGCATAAAGGAGCCCTTCGGGGGAGGGGGCTTTAATGTAATAG         | -14.40 | 212979-212959 |  |
| ORF 247   | + Erpin +    | GATAACATAATGCCCTCCCTTCATTAAGGAGGGGGCTTTATTTACTTATA     | -19.20 | 214043-214064 |  |
| ORF 249   | + Erpin +    | AGCCAAATAAACCCTCCCTTCATTAAGGAGGGGGCTTTATGCTCTCA        | -13.20 | 215669-215690 |  |
| ORF 251   | + Erpin +    | TGTTGCTATAAAGCCCTCCCTTCGGGAGGGGGCTTTATGCTAAATTT        | -17.90 | 221747-221768 |  |
| ORF 263   | + Both +     | TTTGACATAAAGCCCTCCCTTCACACCCCTTTATTTCCCTGTT            | -11.70 | 222145-222162 |  |
| ORF 265   | + Rnamotif + | TTCCGAGGCATATACCTCACTTATCTTGGGGGATATGCTGTTATA          | - 8.50 | 223844-223869 |  |
| ORF 267   | + Both +     | GTTTAAATTAAGGAGCPTTAATTAAGGAGGGGGCTTTATTTTGGCTA        | -14.10 | 224652-224673 |  |
| ORF 269   | + Erpin +    | AAGACTGGGCAAAAGACATTTAAAGAGTGGTGGCTGCCAGTCACTTTCTGCGGT | -14.93 | 225691-225733 |  |
| ORF 274   | + Both +     | GTAAATAAATACCAGCCCTTCGGGGGCTGTTTATTTATCTAG             | -18.70 | 227846-227865 |  |
| ORF 276   | + Both +     | AAGCATAAATAGGAGGCTTTATGCTCTCCTTTATTTGCAATTA            | -14.10 | 228489-228508 |  |
| ORF 284   | + Both +     | TAACATAAACCCTCCCTTCGGGGGAGGGGGCTTTATTTCCCTT            | -18.50 | 233224-233241 |  |
| ORF 285   | + Both +     | AACAGTATAATCGGAGTCCATTTGGACTCCCTTTATATCGTA             | -16.70 | 234194-234213 |  |
| ORF 291   | + Both +     | GATTGCTATAAAGAGAGGATTAATCTCTCTCTTTTATGTTGT             | -14.40 | 236116-236138 |  |
| ORF 292   | + Both +     | TACCATAAATACCTCCCTTCGGGGGAGGGGGCTTTATATGTTG            | -14.70 | 236776-236791 |  |
| ORF 293   | + Both +     | TAAGAGCATAAAGCCCTCCCTTCGGGGGAGGGGGCTTTATGCAATAATTT     | -17.90 | 237218-237239 |  |
| ORF 296   | + Both +     | TTGTATAAATAGAGCCCTTCGGGGGCTCTTCTATTTCGC                | -15.10 | 239090-239105 |  |
| ORF 298   | + Both +     | ACTTAATATACACCCCTCCCTTCGGGGGAGGGGGCTTTATTTATCTTTT      | -19.00 | 240277-240296 |  |
| ORF 306   | + Both +     | AGAAATAATAGAGGACCTTCGGGCTCTCTTTTAAACCGAC               | -16.30 | 243758-243775 |  |
| ORF 307   | + Both +     | AAAGTCATAAACCCTCCCTTCAGGAGGGGGCTTTTACATFAAA            | -15.20 | 243954-243974 |  |
| ORF 313   | + Both +     | GTTATATAATGCCCTCCCTTCGGGGGAGGGGGCTTTATTTTATT           | -18.20 | 246626-246646 |  |
| ORF 319   | + Both +     | ATTATGAAATGGGGGCTTAAAGACCCCTTATCTATTATA                | -15.10 | 249167-249184 |  |
| ORF 322   | + Both +     | ACGCCATAATGCCCTCCCTTCGGGGGAGGGGGCTTTTATATCCCT          | -18.20 | 250436-250453 |  |
| ORF 329   | + Both +     | ATGCTTAATTAAGGAGGGTAAATACCTCCCTTTTATATA                | -12.80 | 252726-252743 |  |
| ORF 334   | + Both +     | ATGCTATAATGCCCTCCCTTCGGGGGAGGGGGCTTTATTTGCTA           | -18.20 | 254927-254944 |  |
| ORF 342   | + Both +     | AATCTAATACATAAAGGGCTCTTCGGGAGGGGGCTTTATTTTCTTTAT       | -11.70 | 259065-259088 |  |
| ORF 347   | + Both +     | CCAATGAGATACCCCTCCCTTCATTCGGGGAGGGGGCTTTTGGACATCT      | -17.90 | 263102-263122 |  |
| ORF 348   | + Both +     | CTATTGATAATGCCCTCCCTTCGGGGGAGGGGGCTTTATTTGCTTAA        | -22.00 | 263633-263652 |  |
| ORF 351   | + Rnamotif + | TACGGCATAAACCCTCCCTTCGATTAAGGAGGGGGCTTTATGCTTTTAT      | -18.00 | 265810-265831 |  |
| ORF 352   | - Both -     | TAAAGACATAATCCCTCCCTTCATTAAGGAGGGGGCTTTATGCCGTAAT      | -17.10 | 265831-265810 |  |
| ORF 355   | + Both +     | AAGTAAACATAGAGCTAGCCCTTAAGGGGGCTAGCTCTTATATTATT        | -14.70 | 267454-267474 |  |
| ORF 356   | - Rnamotif - | AATAAATAAAGCCCTCCCTTCATTAAGGAGGGGGCTTTATGTTATCTTA      | -14.70 | 267474-267454 |  |
| ORF 357   | - Both -     | AGCTAAATAAACCCTCCCTTCATTAAGGAGGGGGCTTTATCAGGTTAT       | -16.00 | 268288-268268 |  |
| ORF 358   | - Both -     | AATAAATAAAGCCCTCCCTTCAGGAGGGGGCTTTATGTTGTTATG          | -15.70 | 268954-268934 |  |
| ORF 359   | - Rnamotif - | TGTGCTGAAATGCCAGGGGGTTCGCCACCCCTGGCTATATTATGCTA        | -18.00 | 269672-269650 |  |
| ORF 360   | - Both -     | CATATTCTAAGAGTACTGCTGCTACTCTTTTATGTTGCA                | -14.10 | 270872-270855 |  |
| ORF 363   | - Both -     | CCATATAGCTGCTCCCTTCGGGGAGGGGGCTTTATGCTTATGCTC          | -11.20 | 272004-271987 |  |
| ORF 365   | - Both -     | GACGATATAGCCCTCCCTTCGGGGAGGGGGCTTTATTTT                | -18.50 | 273178-273161 |  |
| ORF 366   | - Erpin -    | TAGACATAAAGCCCTCCCTTAATTAAGGAGGGGGCTTTATGCTAACAA       | -16.50 | 275278-275257 |  |
| ORF 368   | - Both -     | TTAAGTGTATACACCCCTCCCTTAATTAAGGAGGGGGCTTTATTTCCCAATTT  | -17.10 | 276961-276949 |  |

Fig S3. Phage KTN4 predicted terminators with palindromes marked blue.



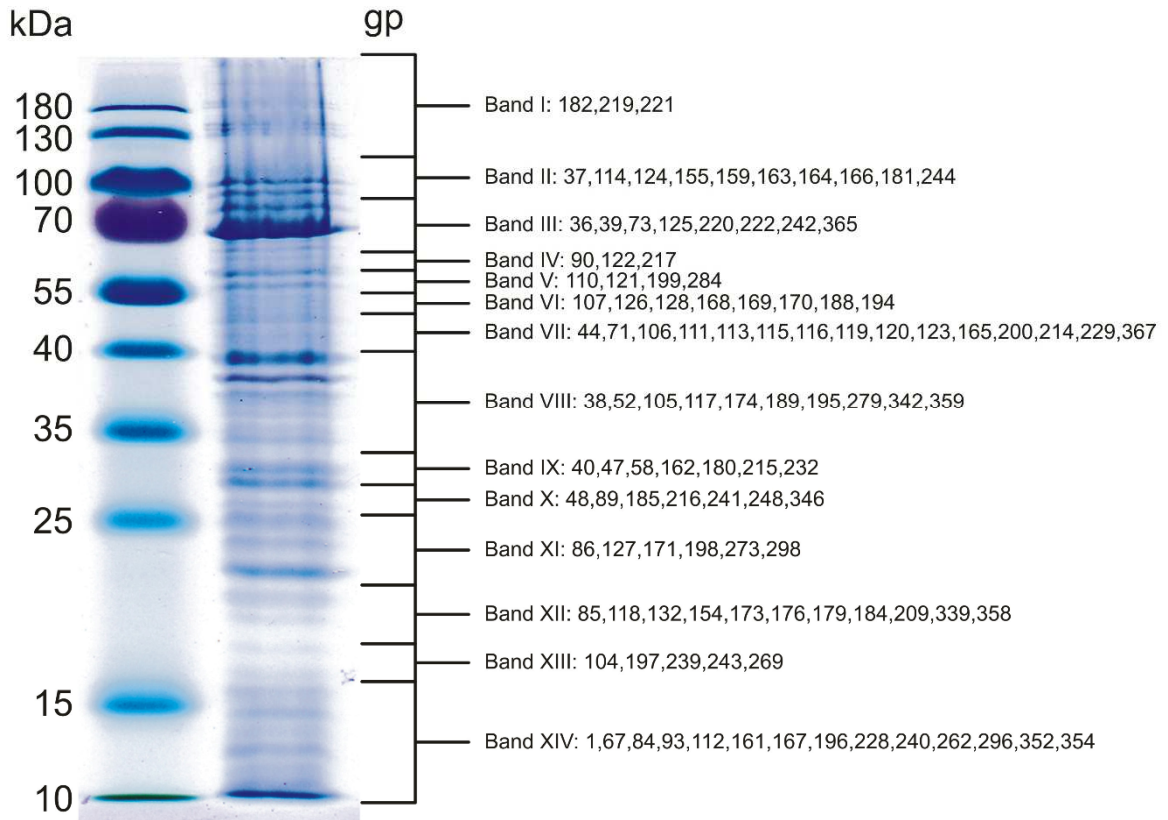

**Fig. S4.** SDS-PAGE pattern of KTN4 structural proteome against PageRuler Prestained Protein Ladder (Thermo Scientific) in first line. The corresponding molecular weight is mentioned left. The numbered fractions on the right, correspond to gel slices analyzed individually by ESI-MS/MS. The proteins are mentioned in the slice in which they were most abundantly present.

**Table S1.** ESI-MS/MS analysis of denaturated phage particles after fractionation on SDS-PAGE gel.

| №  | Protein | Identified function                              | Band № | Molecular weight (DA) |              | Number of identified peptides | Sequence coverage | Identity with other phages (BLASTP) |          |          |          |
|----|---------|--------------------------------------------------|--------|-----------------------|--------------|-------------------------------|-------------------|-------------------------------------|----------|----------|----------|
|    |         |                                                  |        | MS                    | SDS-PAGE     |                               |                   | phi KZ                              | PhiP AK3 | 201phi-1 | PA 7     |
| 1  | gp1     | Uncharacterized protein                          | 14     | 14<br>673.80          | 14563.<br>8  | 3                             | 35.66<br>%        | 99<br>%                             | 37%      | 39%      | -        |
| 2  | gp36    | Structural head protein                          | 3      | 62<br>440.10          | 62330.<br>1  | 26                            | 81.50<br>%        | 99<br>%                             | 58%      | 54%      | 99<br>%  |
| 3  | gp37    | Structural head protein                          | 2      | 106<br>511.10         | 10640<br>1.1 | 32                            | 55.70<br>%        | 99<br>%                             | 57%      | 48%      | -        |
| 4  | gp38    | Structural head protein                          | 8      | 36<br>785.70          | 36675.<br>7  | 13                            | 63.44<br>%        | 100<br>%                            | 49%      | 44%      | 99<br>%  |
| 5  | gp39    | Tail sheath protein                              | 3      | 79<br>511.20          | 79401.<br>2  | 33                            | 78.78<br>%        | 99<br>%                             | 69%      | 63%      | 98<br>%  |
| 6  | gp40    | Structural protein                               | 9      | 32<br>658.70          | 32548.<br>7  | 14                            | 73.47<br>%        | 100<br>%                            | 73%      | 76%      | -        |
| 7  | gp44    | Structural head protein                          | 7      | 50<br>478.80          | 50368.<br>8  | 19                            | 60.20<br>%        | 98<br>%                             | 64%      | 54%      | 98<br>%  |
| 8  | gp47    | Structural protein                               | 9      | 30<br>253.60          | 30143.<br>6  | 9                             | 50.00<br>%        | 99<br>%                             | 45%      | 40%      | -        |
| 9  | gp48    | Structural head protein                          | 10     | 29<br>956.50          | 29846.<br>5  | 7                             | 80.30<br>%        | 98<br>%                             | -        | -        | -        |
| 10 | gp52    | Chain A monomeric subunit of Tubz                | 8      | 36<br>567.20          | 36457.<br>2  | 2                             | 12.65<br>%        | 99<br>%                             | 37%      | 31%      | -        |
| 11 | gp58    | Uncharacterized protein                          | 9      | 30<br>615.90          | 30505.<br>9  | 6                             | 32.44<br>%        | 99<br>%                             | 71%      | 61%      | -        |
| 12 | gp67    | Uncharacterized protein                          | 14     | 15<br>500.60          | 15390.<br>6  | 3                             | 36.03<br>%        | 98<br>%                             | 46%      | 44%      | 98<br>%  |
| 13 | gp71    | Structural head protein                          | 7      | 43<br>687.90          | 43577.<br>9  | 13                            | 51.92<br>%        | 100<br>%                            | 55%      | 52%      | 99<br>%  |
| 14 | gp73    | Uncharacterized protein                          | 3      | 70<br>889.30          | 70779.<br>3  | 14                            | 33.01<br>%        | 98<br>%                             | 48%      | 41%      | 98<br>%  |
| 15 | gp84    | Uncharacterized protein                          | 14     | 16<br>424.50          | 16314.<br>5  | 6                             | 71.32<br>%        | 99<br>%                             | 37%      | 31%      | -        |
| 16 | gp85    | Uncharacterized protein                          | 12     | 20<br>854.40          | 20744.<br>4  | 7                             | 55.68<br>%        | 95<br>%                             | -        | -        | 95<br>%  |
| 17 | gp86    | Uncharacterized protein                          | 11     | 24<br>057.30          | 23947.<br>3  | 3                             | 21.14<br>%        | 96<br>%                             | 39%      | 32%      | 96<br>%  |
| 18 | gp89    | Uncharacterized protein                          | 10     | 28<br>962.10          | 28852.<br>1  | 9                             | 47.56<br>%        | 100<br>%                            | 55%      | 53%      | -        |
| 19 | gp90    | Non-virion DNA-dependent RNA polymerase subunit* | 5      | 60<br>527.30          | 60417.<br>3  | 2                             | 7.90<br>%         | 99<br>%                             | 58%      | 50%      | 99<br>%  |
| 20 | gp93    | Uncharacterized protein                          | 14     | 14<br>936.80          | 14826.<br>8  | 5                             | 70.83<br>%        | -                                   | -        | 36%      | 10<br>0% |
| 21 | gp104   | Uncharacterized protein                          | 13     | 19<br>031.70          | 18921.<br>7  | 4                             | 33.13<br>%        | 96<br>%                             | -        | 26%      | 98<br>%  |
| 22 | gp105   | Structural head protein                          | 8      | 34<br>798.90          | 34688.<br>9  | 12                            | 63.60<br>%        | 99<br>%                             | 47%      | 38%      | 99<br>%  |
| 23 | gp106   | $\beta/\beta'$ -like virion-associated proteins  | 7      | 50<br>834.20          | 50724.<br>2  | 16                            | 55.95<br>%        | 99<br>%                             | 65%      | 56%      | 99<br>%  |
| 24 | gp107   | Structural protein                               | 6      | 54<br>795.30          | 54685.<br>3  | 23                            | 80.47<br>%        | 99<br>%                             | 37%      | 31%      | 99<br>%  |

|    |       |                         |    |               |              |    |            |          |     |     |         |
|----|-------|-------------------------|----|---------------|--------------|----|------------|----------|-----|-----|---------|
| 25 | gp110 | Structural head protein | 5  | 56<br>385.00  | 56275        | 12 | 42.68<br>% | 97<br>%  | 85% | -   | 98<br>% |
| 26 | gp111 | Structural head protein | 7  | 47<br>327.00  | 47217        | 19 | 64.16<br>% | 100<br>% | 37% | 34% | -       |
| 27 | gp112 | Structural head protein | 14 | 17<br>092.70  | 16982.<br>7  | 7  | 83.89<br>% | 99<br>%  | 35% | 33% | -       |
| 28 | gp113 | Structural head protein | 7  | 49<br>280.00  | 49170        | 15 | 43.06<br>% | 99<br>%  | 25% | 26% | 99<br>% |
| 29 | gp114 | Structural protein      | 2  | 110<br>487.40 | 11037<br>7.4 | 30 | 50.57<br>% | 99<br>%  | 58% | 52% | 99<br>% |
| 30 | gp115 | Structural protein      | 7  | 40<br>628.10  | 40518.<br>1  | 7  | 28.53<br>% | 99<br>%  | 58% | 56% | -       |
| 31 | gp116 | Structural head protein | 7  | 44<br>414.80  | 44304.<br>8  | 14 | 51.71<br>% | 98<br>%  | 63% | 54% | -       |
| 32 | gp117 | Structural head protein | 8  | 36<br>014.60  | 35904.<br>6  | 19 | 78.96<br>% | 100<br>% | 49% | 47% | -       |
| 33 | gp118 | Structural head protein | 12 | 21<br>586.50  | 21476.<br>5  | 6  | 52.27<br>% | 99<br>%  | 53% | 51% | -       |
| 34 | gp119 | Structural head protein | 7  | 50<br>842.60  | 50732.<br>6  | 17 | 50.00<br>% | 99<br>%  | 38% | 35% | 99<br>% |
| 35 | gp120 | Structural head protein | 7  | 48<br>412.40  | 48302.<br>4  | 16 | 44.03<br>% | 98<br>%  | 26% | -   | 98<br>% |
| 36 | gp121 | Structural head protein | 6  | 56<br>940.00  | 56830        | 16 | 51.51<br>% | 98<br>%  | 27% | 30% | 97<br>% |
| 37 | gp122 | Structural head protein | 4  | 59<br>192.20  | 59082.<br>2  | 26 | 64.11<br>% | 98<br>%  | -   | -   | 97<br>% |
| 38 | gp123 | Structural head protein | 7  | 42<br>552.20  | 42442.<br>2  | 11 | 35.70<br>% | 99<br>%  | 34% | 28% | -       |
| 39 | gp124 | Structural head protein | 2  | 89<br>012.60  | 88902.<br>6  | 20 | 39.43<br>% | 97<br>%  | 31% | 29% | 99<br>% |
| 40 | gp125 | Uncharacterized protein | 3  | 63<br>780.40  | 63670.<br>4  | 6  | 13.76<br>% | 99<br>%  | 48% | 42% | -       |
| 41 | gp126 | Structural head protein | 4  | 55<br>292.40  | 55182.<br>4  | 12 | 37.53<br>% | 99<br>%  | 59% | 54% | -       |
| 42 | gp127 | Uncharacterized protein | 11 | 22<br>993.10  | 22883.<br>1  | 3  | 25.93<br>% | 97<br>%  | 47% | 36% | -       |
| 43 | gp128 | Structural protein      | 4  | 52<br>562.30  | 52452.<br>3  | 7  | 22.81<br>% | 99<br>%  | 44% | 42% | -       |
| 44 | gp132 | Uncharacterized protein | 12 | 20<br>422.20  | 20312.<br>2  | 3  | 29.01<br>% | 99<br>%  | 64% | 66% | -       |
| 45 | gp154 | Structural head protein | 12 | 21<br>118.50  | 21008.<br>5  | 8  | 67.80<br>% | 100<br>% | 52% | 53% | -       |
| 46 | gp155 | Major head protein      | 2  | 83<br>044.70  | 82934.<br>7  | 27 | 72.03<br>% | 98<br>%  | 67% | 63% | 98<br>% |
| 47 | gp159 | Uncharacterized protein | 2  | 81<br>323.90  | 81213.<br>9  | 7  | 12.80<br>% | 98<br>%  | 43% | 34% | 98<br>% |
| 48 | gp161 | Structural protein      | 14 | 16<br>948.80  | 16838.<br>8  | 4  | 43.45<br>% | 96<br>%  | -   | 35% | 99<br>% |
| 49 | gp162 | Structural protein      | 9  | 33<br>581.10  | 33471.<br>1  | 10 | 38.19<br>% | 98<br>%  | 40% | 36% | 99<br>% |
| 50 | gp163 | Structural head protein | 2  | 84<br>447.10  | 84337.<br>1  | 19 | 38.23<br>% | 99<br>%  | 57% | 49% | 99<br>% |
| 51 | gp164 | Structural protein      | 2  | 100<br>450.10 | 10034<br>0.1 | 19 | 33.75<br>% | 97<br>%  | 56% | 55% | -       |
| 52 | gp165 | Structural protein      | 7  | 48<br>629.30  | 48519.<br>3  | 11 | 37.94<br>% | 99<br>%  | 53% | 54% | -       |
| 53 | gp166 | Tail tip protein        | 2  | 85<br>168.40  | 85058.<br>4  | 24 | 51.53<br>% | 97<br>%  | 41% | 38% | -       |

|    |       |                                                |    |               |             |    |            |          |     |     |          |
|----|-------|------------------------------------------------|----|---------------|-------------|----|------------|----------|-----|-----|----------|
| 54 | gp167 | Structural protein                             | 14 | 12<br>741.90  | 12631.<br>9 | 5  | 54.72<br>% | 95<br>%  | 46% | 45% | -        |
| 55 | gp168 | Structural protein                             | 6  | 53<br>074.90  | 52964.<br>9 | 11 | 32.97<br>% | 99<br>%  | 40% | 38% | 99<br>%  |
| 56 | gp169 | Structural protein                             | 6  | 51<br>629.20  | 51519.<br>2 | 10 | 35.23<br>% | 99<br>%  | 39% | 35% | 28<br>%  |
| 57 | gp170 | Structural protein                             | 6  | 52<br>794.50  | 52684.<br>5 | 17 | 54.49<br>% | 98<br>%  | 47% | 38% | 25<br>%  |
| 58 | gp171 | Uncharacterized protein                        | 11 | 24<br>417.30  | 24307.<br>3 | 6  | 42%<br>%   | 100<br>% | 36% | 35% | -        |
| 59 | gp173 | Uncharacterized protein                        | 13 | 20<br>064.30  | 19954.<br>3 | 3  | 22.22<br>% | 99<br>%  | 46% | 40% | -        |
| 60 | gp174 | Structural protein                             | 8  | 33<br>824.80  | 33714.<br>8 | 12 | 73.65<br>% | 99<br>%  | 70% | 66% | -        |
| 61 | gp176 | Structural protein                             | 12 | 19<br>664.70  | 19554.<br>7 | 2  | 12.80<br>% | 98<br>%  | 30% | -   | -        |
| 62 | gp179 | Structural protein                             | 12 | 20<br>550.00  | 20440       | 7  | 43.43<br>% | 98<br>%  | 45% | 45% | 99<br>%  |
| 63 | gp180 | Endolysin*                                     | 9  | 30<br>282.90  | 30172.<br>9 | 8  | 46.03<br>% | 97<br>%  | 47% | 44% | 51<br>%  |
| 64 | gp181 | Putative tail sheath protein                   | 2  | 85<br>190.00  | 85080       | 31 | 77.35<br>% | 98<br>%  | 55% | 41% | 98<br>%  |
| 65 | gp182 | Putative tail fiber protein                    | 1  | 116<br>150.10 | 11913<br>0  | 38 | 72.58<br>% | 97<br>%  | 36% | 28% | 97<br>%  |
| 66 | gp184 | Uncharacterized protein                        | 12 | 19<br>939.70  | 18480       | 4  | 30.36<br>% | 98<br>%  | 25% | -   | -        |
| 67 | gp185 | $\beta/\beta'$ -like virion-associated protein | 10 | 26<br>098.10  | 24640       | 11 | 63.84<br>% | 99<br>%  | 67% | 62% | -        |
| 68 | gp188 | Uncharacterized protein                        | 6  | 55<br>385.50  | 52470       | 5  | 14.46<br>% | 99<br>%  | 80% | 70% | -        |
| 69 | gp189 | Structural head protein                        | 8  | 34<br>215.70  | 33000       | 14 | 89%<br>%   | 99<br>%  | 32% | 28% | -        |
| 70 | gp194 | Structural head protein                        | 6  | 51<br>221.40  | 48510       | 25 | 86.17<br>% | 99<br>%  | 58% | 53% | -        |
| 71 | gp195 | Uncharacterized protein                        | 8  | 36<br>016.30  | 34760       | 9  | 39.87<br>% | 100<br>% | 39% | 38% | -        |
| 72 | gp196 | Uncharacterized protein                        | 14 | 16<br>784.10  | 14740       | 3  | 52.24<br>% | 99<br>%  | 26% | -   | 99<br>%  |
| 73 | gp197 | Structural protein                             | 13 | 17<br>896.10  | 17270       | 6  | 65.60<br>% | 99<br>%  | -   | -   | -        |
| 74 | gp198 | Uncharacterized protein                        | 10 | 24<br>279.80  | 22990       | 8  | 66.99<br>% | 99<br>%  | 46% | 42% | -        |
| 75 | gp199 | Structural head protein                        | 5  | 58<br>593.30  | 56980       | 22 | 51.93<br>% | 99<br>%  | -   | -   | -        |
| 76 | gp200 | Structural head protein                        | 7  | 44<br>512.30  | 43010       | 16 | 60.10<br>% | 99<br>%  | 52% | 44% | -        |
| 77 | gp209 | Uncharacterized protein                        | 10 | 20<br>225.00  | 18590       | 3  | 22.48<br>% | 99<br>%  | 45% | 35% | -        |
| 78 | gp214 | Structural protein                             | 7  | 41<br>360.80  | 38720       | 13 | 73.01<br>% | 99<br>%  | 41% | 38% | 99<br>%  |
| 79 | gp215 | Head protease                                  | 9  | 31<br>928.10  | 29700       | 12 | 64.07<br>% | 100<br>% | 60% | 56% | -        |
| 80 | gp216 | Structural head protein                        | 10 | 27<br>850.00  | 26400       | 9  | 60.42<br>% | 100<br>% | 70% | 63% | 10<br>0% |
| 81 | gp217 | Structural head protein                        | 5  | 61<br>170.50  | 56210       | 19 | 72.99<br>% | 98<br>%  | 48% | 41% | -        |
| 82 | gp219 | $\beta/\beta'$ -like virion-associated protein | 1  | 167<br>516.50 | 15851<br>0  | 51 | 51.56<br>% | 99<br>%  | 58% | 53% | -        |

|     |       |                                                |     |               |            |    |            |          |     |     |         |
|-----|-------|------------------------------------------------|-----|---------------|------------|----|------------|----------|-----|-----|---------|
| 83  | gp220 | $\beta/\beta'$ -like virion-associated protein | 3   | 63<br>084.20  | 59840      | 18 | 49.63<br>% | 97<br>%  | 75% | 68% | 98<br>% |
| 84  | gp221 | Structural peptidoglycan hydrolase             | 1   | 246<br>430.90 | 24233<br>0 | 62 | 37.90<br>% | 98<br>%  | 37% | 34% | 98<br>% |
| 85  | gp222 | Structural protein                             | 3   | 77<br>193.00  | 71720      | 17 | 37.42<br>% | 97<br>%  | 64% | 63% | 98<br>% |
| 86  | gp228 | Uncharacterized protein                        | 14  | 13<br>039.60  | 11990      | 2  | 24.22<br>% | 100<br>% | -   | -   | -       |
| 87  | gp229 | Thymidylate kinase*                            | 7   | 40<br>994.40  | 38720      | 12 | 49.15<br>% | 100<br>% | 35% | 32% | -       |
| 88  | gp232 | Uncharacterized protein                        | 10  | 30<br>790.70  | 28710      | 3  | 18.77<br>% | 97<br>%  | -   | -   | 95<br>% |
| 89  | gp239 | Uncharacterized protein                        | 13  | 19<br>305.20  | 17600      | 3  | 23.75<br>% | 98<br>%  | 46% | 41% | -       |
| 90  | gp240 | Structural protein                             | 14  | 17<br>449.40  | 15730      | 2  | 19.58<br>% | 100<br>% | 60% | 62% | -       |
| 91  | gp241 | Uncharacterized protein                        | 10  | 25<br>888.40  | 24090      | 6  | 38.36<br>% | 99<br>%  | 43% | 36% | 98<br>% |
| 92  | gp242 | Structural protein                             | 3   | 72<br>744.80  | 70950      | 13 | 28.68<br>% | 99<br>%  | 34% | 28% | 98<br>% |
| 93  | gp243 | Structural protein                             | 13  | 18<br>071.50  | 17160      | 4  | 57.05<br>% | 100<br>% | -   | -   | 99<br>% |
| 94  | gp244 | Structural protein                             | 2   | 83<br>120.40  | 76670      | 23 | 37.45<br>% | 99<br>%  | 58% | 51% | 99<br>% |
| 95  | gp248 | Uncharacterized protein                        | 10  | 29<br>676.40  | 25960      | 2  | 10.17<br>% | 100<br>% | -   | 24% | -       |
| 96  | gp262 | Uncharacterized protein                        | 14  | 10<br>000.80  | 7590       | 2  | 24.64<br>% | 97<br>%  | -   | -   | 97<br>% |
| 97  | gp269 | Structural protein                             | 14  | 17<br>955.30  | 15070      | 4  | 35.04<br>% | 100<br>% | 41% | 33% | 99<br>% |
| 98  | gp273 | Structural protein                             | 8.9 | 23<br>729.20  | 21890      | 4  | 20.60<br>% | 100<br>% | -   | -   | -       |
| 99  | gp279 | Uncharacterized protein                        | 8   | 35<br>239.80  | 33220      | 2  | 14.24<br>% | 100<br>% | -   | -   | -       |
| 100 | gp284 | Thymidylate synthase*                          | 5   | 58<br>214.90  | 53680      | 2  | 5.94<br>%  | 99<br>%  | 46% | 60% | -       |
| 101 | gp296 | Structural protein                             | 14  | 15<br>184.00  | 12980      | 4  | 50.85<br>% | 99<br>%  | 32% | -   | 98<br>% |
| 102 | gp298 | Uncharacterized protein                        | 11  | 25<br>232.70  | 23100      | 2  | 15.24<br>% | 96<br>%  | -   | -   | -       |
| 103 | gp339 | Uncharacterized protein                        | 12  | 20<br>495.30  | 18810      | 3  | 19.30<br>% | 100<br>% | 57% | 57% | -       |
| 104 | gp342 | Uncharacterized protein                        | 8   | 34<br>070.20  | 31900      | 5  | 19.65<br>% | 93<br>%  | -   | -   | 97<br>% |
| 105 | gp346 | Uncharacterized protein                        | 12  | 26<br>364.50  | 23870      | 2  | 11.06<br>% | 98<br>%  | 48% | 40% | 99<br>% |
| 106 | gp352 | Uncharacterized protein                        | 14  | 17<br>830.30  | 14190      | 8  | 66.67<br>% | 88<br>%  | -   | -   | 97<br>% |
| 107 | gp354 | Uncharacterized protein                        | 14  | 7<br>495.30   | 6380       | 2  | 32.76<br>% | 91<br>%  | -   | -   | 95<br>% |
| 108 | gp358 | Uncharacterized protein                        | 12  | 21<br>849.80  | 19140      | 2  | 16.09<br>% | 63<br>%  | 60% | 30% | 63<br>% |
| 109 | gp359 | Structural protein                             | 8   | 37<br>136.40  | 36630      | 8  | 47.75<br>% | 97<br>%  | 53% | -   | 96<br>% |
| 110 | gp365 | Structural protein                             | 3   | 72<br>814.60  | 68090      | 19 | 45.23<br>% | 76<br>%  | -   | -   | 98<br>% |
| 111 | gp367 | Ribonucleoside reductase*                      | 7   | 45<br>827.80  | 41910      | 9  | 28.08<br>% | 98<br>%  | 75% | 64% | -       |

\*enzymes non-associated with phage particles



|    |                         |      |      |      |      |      |      |     |      |      |      |      |      |      |
|----|-------------------------|------|------|------|------|------|------|-----|------|------|------|------|------|------|
| 54 | Mi151                   | ■    | □    | □    | ■    | ■    | ■    | □   | □    | □    | □    | □    | □    | ■    |
| 55 | US447                   | □    | ■    | □    | □    | □    | □    | □   | □    | □    | □    | □    | □    | □    |
| 56 | Bo548                   | □    | ■    | ■    | □    | □    | □    | □   | □    | □    | □    | □    | □    | □    |
| 57 | Br680                   | □    | □    | □    | □    | □    | □    | □   | □    | □    | □    | ■    | □    | □    |
| 58 | PA6                     | ■    | ■    | ■    | □    | □    | □    | □   | □    | □    | ■    | □    | □    | □    |
|    | Summary                 | 27   | 39   | 34   | 19   | 18   | 23   | 2   | 7    | 20   | 13   | 10   | 14   | 27   |
|    | % of the tested strains | 46.6 | 67.2 | 58.6 | 32.7 | 31.0 | 39.7 | 3.5 | 12.1 | 34.5 | 22.4 | 17.2 | 24.1 | 46.6 |

grey box –active, white box – no activity.
